# Supplementary material
Source: PubMed Central journal article supplement (PMC6119655)
Supplement: NIHMS948866-supplement-supplement_1.pdf [file NIHMS948866-supplement-supplement_1.pdf]

**Supplemental Table 1.** Electronic search strategies (last done on 12/14/2017)

EMBASE (via Elsevier):

- 'neoplasm'/exp
- 'malignan\*':ti,ab OR 'neoplasm\*':ti,ab OR 'cancer\*':ti,ab OR 'carcinoma\*':ti,ab OR 'adenocarcinoma\*':ti,ab OR 'tumour\*':ti,ab OR 'tumor\*':ti,ab
- 'venous thromboembolism'/exp OR 'venous thrombosis'/exp
- 'venous thrombo\*':ti,ab OR 'VTE\*':ti,ab
- 'blood clotting factor 10a inhibitor'/exp OR 'dabigatran'/exp
- 'apixaban\*':ti,ab OR 'betrixaban\*':ti,ab OR 'edoxaban\*':ti,ab OR 'rivaroxaban\*':ti,ab OR 'dabigatran\*':ti,ab OR 'ximelagatran\*':ti,ab
- 'low molecular weight heparin'/exp
- 'enoxaparin\*':ti,ab OR 'dalteparin\*':ti,ab OR 'tinzaparin\*':ti,ab OR 'nadroparin\*':ti,ab OR 'LMWH\*':ti,ab
- [2007-2017]/py AND [humans]/lim AND ([adult]/lim OR [aged]/lim) AND ([embase]/lim OR [medline]/lim)
- (#1 OR #2) AND (#3 OR #4) AND (#5 OR #6) AND (#7 OR #8) AND (#9)

MEDLINE (via PubMed):

- neoplasms[mesh]
- malignan\*[tiab] OR neoplasm\*[tiab] OR cancer\*[tiab] OR carcinoma\*[tiab] OR adenocarcinoma\*[tiab] OR tumour\*[tiab] OR tumor\*[tiab]
- venous thromboembolism[mesh] OR venous thrombosis[mesh]
- venous thrombo\*[tiab] OR VTE\*[tiab]
- factor xa inhibitors[Mesh] OR dabigatran[mesh]
- apixaban\*[tiab] OR betrixaban\*[tiab] OR edoxaban\*[tiab] OR rivaroxaban\*[tiab] OR dabigatran\*[tiab] OR ximelagatran\*[tiab]
- heparin, low-molecular-weight[mesh]
- Enoxaparin\*[tiab] OR dalteparin\*[tiab] OR tinzaparin\*[tiab] OR nadroparin\*[tiab] OR LMWH\*[tiab]
- "2007/01/01"[pdat]:"2017/12/31"[pdat]
- (#1 OR #2) AND (#3 OR #4) AND (#5 OR #6) AND (#7 OR #8) AND (#9)

CENTRAL (via Cochrane):

- MeSH descriptor: [Neoplasms] explode all trees
- 'malignan\*' OR 'neoplasm\*' OR 'cancer\*' OR 'carcinoma\*' OR 'adenocarcinoma\*' OR 'tumour\*' OR 'tumor\*'
- MeSH descriptor: [Venous Thromboembolism] explode all trees
- MeSH descriptor: [Venous Thrombosis] explode all trees
- 'venous thrombo\*' OR 'VTE\*'
- MeSH descriptor: [Factor Xa Inhibitors] explode all trees
- MeSH descriptor: [Dabigatran] explode all trees
- 'apixaban\*' OR 'betrixaban\*' OR 'edoxaban\*' OR 'rivaroxaban\*' OR 'dabigatran\*' OR 'ximelagatran\*'
- MeSH descriptor: [Heparin, Low-Molecular-Weight] explode all trees
- 'enoxaparin\*' OR 'dalteparin\*' OR 'tinzaparin\*' OR 'nadroparin\*' OR 'LMWH\*'
- (#1 OR #2) AND (#3 OR #4 OR #5) AND (#6 OR #7 OR #8) AND (#9 OR #10)  
[Publication Year from 2007 to 2017]
